# Supplementary material for: Association of mutations in the Plasmodium falciparum Kelch13 gene (Pf3D7_1343700) with parasite clearance rates after artemisinin-based treatments—a WWARN individual patient data meta-analysis
Source: BMC Med. 2019 Jan 17;17:1. doi: 10.1186/s12916-018-1207-3 (PMC6335805; doi:10.1186/s12916-018-1207-3)
Supplement: Supplementary file 1 — Details of the systematic literature review. (PDF 213 kb) [file 12916_2018_1207_MOESM1_ESM.pdf]

Table 1. Search strategy for the systematic review of literature

| Database                                                                                                                                                                       | Search Strategy                                                                                                                                                                                            |
|--------------------------------------------------------------------------------------------------------------------------------------------------------------------------------|------------------------------------------------------------------------------------------------------------------------------------------------------------------------------------------------------------|
| <b>Ovid MEDLINE(R) Epub Ahead of Print, In-Process &amp; Other Non-Indexed Citations, Ovid MEDLINE(R) Daily, Ovid MEDLINE and Versions(R) &lt;1946 to January 24, 2018&gt;</b> | 1 ((K13 or kelch) and (half life or parasite clearance)).mp. (71)<br>2 limit 1 to yr="2000 - 2017" (60)                                                                                                    |
| <b>Pubmed</b>                                                                                                                                                                  | (K13 or kelch) and (half life or parasite clearance)<br>Filters activated: Publication date from 2000/01/01 to 2017/12/31                                                                                  |
| <b>Embase &lt;1974 to 2018 January 29&gt;</b>                                                                                                                                  | 1 ((K13 or kelch) and (half life or parasite clearance)).mp. (134)<br>2 limit 1 to yr="2000 - 2017" (124)                                                                                                  |
| <b>Web of Science Core Collection</b>                                                                                                                                          | <b>TOPIC:</b> ((K13 OR kelch) AND (half life OR parasite clearance))<br><b>Timespan:</b> All years. <b>Indexes:</b> SCI-EXPANDED, SSCI, A&HCI, CPCI-S, CPCI-SSH, BKCI-S, BKCI-SSH, ESCI, CCR-EXPANDED, IC. |

Figure 1. Systematic Review Trial Profile

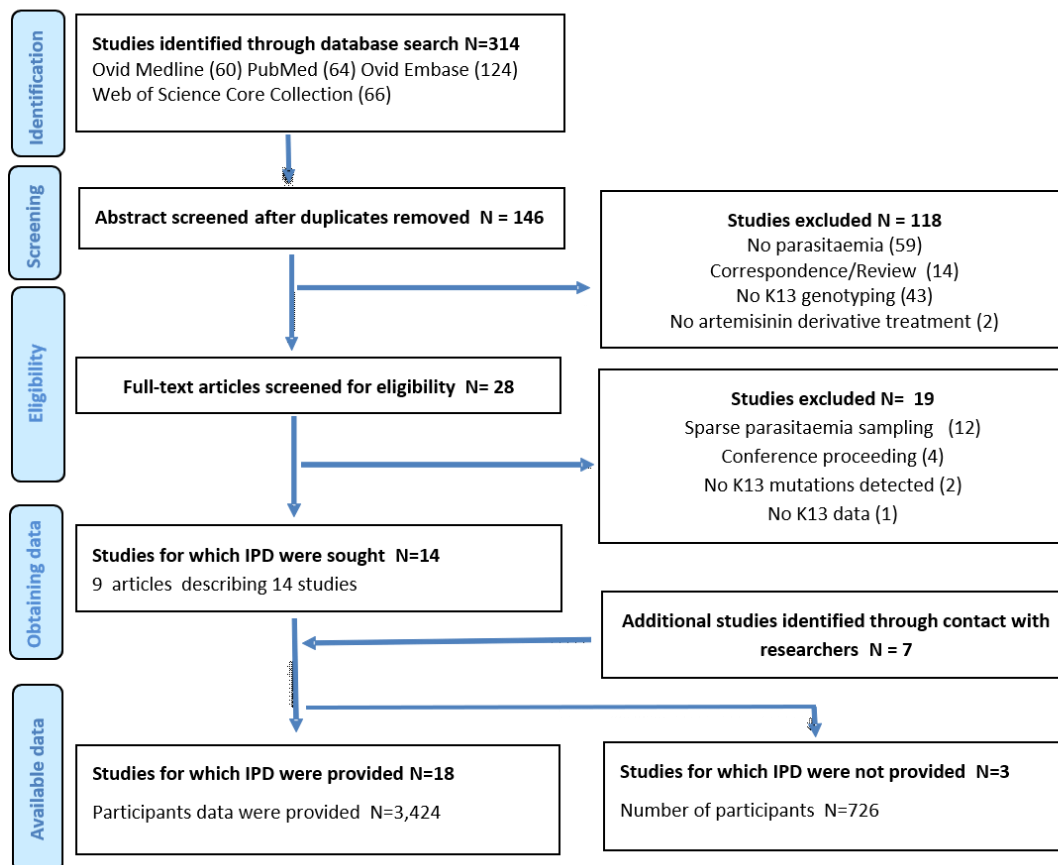

### Assessment of study risk of bias.

Risk was classified as low L, moderate M, or high H using the following rules:

(a) molecular methods:

L = whole gene/propeller region genotyped; M = only specific mutations genotyped

(b) parasite sampling:

L = parasitaemia measured at least twice daily until clearance with 3 samples collected in the first 12h; M = parasitaemia measured twice daily

(c) PC<sub>1/2</sub> exclusions due to sparse data or unsatisfactory model fit (detailed criteria provided in Methods section and Figure 2):

L = < 20% of patients excluded; M = 20% -25% patients excluded; H = ≥25% patients excluded

Table 2. Risk of bias in individual studies.

| Study ID | Risk of Bias      |                   |                             |
|----------|-------------------|-------------------|-----------------------------|
|          | Molecular Methods | Parasite Sampling | PC <sub>1/2</sub> exclusion |
| 1        | L                 | L                 | L                           |
| 2        | L                 | L                 | L                           |
| 3        | L                 | L                 | M                           |
| 4        | L                 | L                 | L                           |
| 5        | L                 | L                 | L                           |
| 6        | L                 | L                 | L                           |
| 7        | L                 | M                 | H                           |
| 8        | M                 | M                 | L                           |
| 9        | L                 | L                 | L                           |
| 10       | L                 | L                 | H                           |
| 11       | L                 | L                 | H                           |
| 12       | L                 | L                 | L                           |
| 13       | L                 | L                 | M <sup>1</sup>              |
| 14       | L                 | L                 | L                           |
| 15       | L                 | L                 | L                           |
| 16       | L                 | L                 | L                           |
| 17       | L                 | L                 | H                           |
| 18       | L                 | L                 | L                           |

PC<sub>1/2</sub> = parasite clearance half- life

<sup>1</sup> the microscopy findings could not be confirmed due to the fact the slides had deteriorated
